# Supplementary material for: Overlapping euchromatin/heterochromatin- associated marks are enriched in imprinted gene regions and predict allele-specific modification
Source: HighWire-hosted journal article supplement (doi:10.1101/gr.067587.107), 2008-09-16
Supplement: Wen_Supplemental_Table_1.pdf [file Wen_Supplemental_Table_1.pdf]

**Supplemental Table 1.** Coordinates of custom imprinting array

| <b>Chromosome</b> | <b>Start<sup>1</sup></b> | <b>End<sup>1</sup></b> | <b>Imprinted Gene Included</b>                                                                       |
|-------------------|--------------------------|------------------------|------------------------------------------------------------------------------------------------------|
| chr1              | 3550000                  | 3700000                | <i>TP73</i>                                                                                          |
| chr1              | 68000000                 | 68400000               | <i>DIRAS3</i>                                                                                        |
| chr2              | 15635000                 | 16785000               |                                                                                                      |
| chr6              | 144216000                | 144465000              | <i>PLAGL1, Hymal</i>                                                                                 |
| chr6              | 160190000                | 160556473              |                                                                                                      |
| chr7              | 50287019                 | 51010342               | <i>GRB10</i>                                                                                         |
| chr7              | 92457810                 | 93003452               | <i>CALCR</i>                                                                                         |
| chr7              | 93601102                 | 94794489               | <i>PEG10, SGCE, PPP1R9A, PONI</i>                                                                    |
| chr7              | 95865658                 | 96583857               | <i>DLX5</i>                                                                                          |
| chr7              | 125900001                | 132000000              | <i>CPA4, MEST, MESTIT1</i>                                                                           |
| chr10             | 64879750                 | 69842996               | <i>CTNNA3</i>                                                                                        |
| chr11             | 1000000                  | 3367849                | <i>H19, IGF2, IGF2AS, INS, KCNQ1, KCNQ1OT1, KCNA1DN, CDKN1C, SLC22A18AS, SLC22A18, PHLDA2, OSBP5</i> |
| chr11             | 6825689                  | 7014184                | <i>ZNF215</i>                                                                                        |
| chr11             | 32037172                 | 32579528               | <i>WT1</i>                                                                                           |
| chr11             | 59567900                 | 59730000               |                                                                                                      |
| chr13             | 46131964                 | 47737931               |                                                                                                      |
| chr14             | 99783114                 | 100981613              | <i>DLK1, MEG3</i>                                                                                    |
| chr15             | 17000001                 | 31400000               | <i>MKRN3, MAGEL2, NDN, SNRPN, SNURF, UBE3A, ATP10A</i>                                               |
| chr18             | 42649549                 | 42969233               | <i>TCEB3C</i>                                                                                        |
| chr19             | 61715851                 | 62440220               | <i>PEG3, ITUP1</i>                                                                                   |
| chr20             | 35426873                 | 35741706               | <i>NNAT</i>                                                                                          |
| chr20             | 41508900                 | 41643913               | <i>L3MBTL</i>                                                                                        |
| chr20             | 56692122                 | 57018532               | <i>GNAS, GNASIAS</i>                                                                                 |

<sup>1</sup>The coordinates are based on UCSC Genome Browser HG17
