# Supplementary material for: Overlapping euchromatin/heterochromatin- associated marks are enriched in imprinted gene regions and predict allele-specific modification
Source: HighWire-hosted journal article supplement (doi:10.1101/gr.067587.107), 2008-09-16
Supplement: Wen_Supplemental_Table_4.pdf [file Wen_Supplemental_Table_4.pdf]

Supplemental Table 4. Double hit sites

| Double Hits ID | Cell line | Array | Chromosome | Start     | End       | Dist. to TSS (bp) | Dist. to CGI (bp) | Dist. to CTCF (bp) | Overlap TS |
|----------------|-----------|-------|------------|-----------|-----------|-------------------|-------------------|--------------------|------------|
| GM_DH1         | GM        | IM    | chr1       | 3562580   | 3564493   | -240              | 0                 | 3512               | No         |
| GM_DH2         | GM        | IM    | chr1       | 3592754   | 3597635   | 468               | 0                 | 33686              | Yes        |
| GM_DH3         | GM        | IM    | chr1       | 3601794   | 3614049   | 9508              | 9001              | -21647             | Yes        |
| GM_DH4         | GM        | IM    | chr1       | 3685650   | 3686449   | 0                 | 0                 | 21295              | Yes        |
| GM_DH5         | GM        | EN    | chr1       | 148398330 | 148399812 | 595               | 52                | 18108              | Yes        |
| GM_DH6         | GM        | IM    | chr10      | 69311225  | 69318007  | 0                 | 0                 | 92729              | Yes        |
| GM_DH7         | GM        | IM    | chr11      | 1583448   | 1585202   | -1067             | 30729             | 8985               | No         |
| GM_DH8         | GM        | EN    | chr11      | 1740158   | 1740652   | -1146             | -729              | 67373              | Yes        |
| GM_DH9         | GM        | IM    | chr11      | 1821040   | 1823669   | -7106             | 17083             | 9690               | No         |
| GM_DH10        | GM        | IM    | chr11      | 1826455   | 1829336   | -1439             | -19277            | 15105              | No         |
| GM_DH11        | GM        | IM    | chr11      | 2243161   | 2245985   | -2773             | -695              | -37064             | No         |
| GM_DH12        | GM        | IM    | chr11      | 2378810   | 2380997   | 0                 | 0                 | -16450             | Yes        |
| GM_DH13        | GM        | IM    | chr11      | 2672067   | 2677750   | -170118           | 0                 | 0                  | Yes        |
| GM_DH14        | GM        | IM    | chr11      | 2964778   | 2970205   | 0                 | 0                 | -28649             | Yes        |
| GM_DH15        | GM        | IM    | chr11      | 3000421   | 3001126   | 13717             | 29664             | 760                | Yes        |
| GM_DH16        | GM        | EN    | chr11      | 64327919  | 64328755  | 629               | 442               | 15734              | Yes        |
| GM_DH17        | GM        | EN    | chr11      | 64396053  | 64401753  | -810              | -252              | -9706              | Yes        |
| GM_DH18        | GM        | EN    | chr13      | 112393127 | 112397041 | 483               | 0                 | 49647              | Yes        |
| GM_DH19        | GM        | IM    | chr14      | 100383379 | 100387339 | 615               | 19193             | 0                  | Yes        |
| GM_DH20        | GM        | IM    | chr15      | 18408629  | 18410171  | -589570           | 0                 | -411512            | No         |
| GM_DH21        | GM        | IM    | chr15      | 18968946  | 18972964  | -26777            | 0                 | 146813             | No         |
| GM_DH22        | GM        | IM    | chr15      | 20045643  | 20049217  | 161806            | 0                 | 81683              | No         |
| GM_DH23        | GM        | IM    | chr15      | 20443098  | 20444469  | 0                 | 0                 | 54391              | Yes        |
| GM_DH24        | GM        | IM    | chr15      | 20634186  | 20637187  | -690              | 0                 | 245479             | Yes        |
| GM_DH25        | GM        | IM    | chr15      | 20927757  | 20931183  | -26759            | 0                 | -507209            | No         |
| GM_DH26        | GM        | IM    | chr15      | 22750479  | 22752782  | 0                 | 0                 | -737280            | Yes        |
| GM_DH27        | GM        | IM    | chr15      | 26632053  | 26636112  | 26717             | 0                 | 521123             | No         |
| GM_DH28        | GM        | IM    | chr15      | 28983635  | 28985844  | 214               | 0                 | -222749            | Yes        |
| GM_DH29        | GM        | IM    | chr15      | 29301477  | 29310933  | -95441            | 5833              | 20855              | No         |
| GM_DH30        | GM        | IM    | chr15      | 29313194  | 29317154  | -89220            | 17550             | 32572              | No         |
| GM_DH31        | GM        | IM    | chr15      | 29408287  | 29419755  | 1912              | 0                 | -94694             | Yes        |
| GM_DH32        | GM        | IM    | chr15      | 29429389  | 29435368  | 23014             | -16182            | -79081             | Yes        |
| GM_DH33        | GM        | IM    | chr15      | 29437432  | 29442234  | 31057             | -9316             | -72215             | Yes        |
| GM_DH34        | GM        | IM    | chr15      | 29532108  | 29533706  | 51440             | 0                 | 16809              | No         |

---

|         |    |    |       |           |           |        |        |         |     |
|---------|----|----|-------|-----------|-----------|--------|--------|---------|-----|
| GM_DH35 | GM | EN | chr15 | 41727873  | 41729393  | 0      | 0      | -39845  | Yes |
| GM_DH36 | GM | EN | chr15 | 41824089  | 41829485  | 0      | 0      | -25383  | Yes |
| GM_DH37 | GM | EN | chr16 | 39407     | 43587     | 0      | 0      | -12002  | Yes |
| GM_DH38 | GM | EN | chr16 | 313957    | 316769    | -25696 | 0      | -35277  | Yes |
| GM_DH39 | GM | EN | chr16 | 416633    | 418761    | 964    | 0      | 64237   | Yes |
| GM_DH40 | GM | IM | chr18 | 42779207  | 42782783  | 0      | 0      | -97483  | Yes |
| GM_DH41 | GM | EN | chr18 | 59754985  | 59756505  | 21260  | 0      | 0       | No  |
| GM_DH42 | GM | EN | chr18 | 59788653  | 59790211  | 320    | 0      | -7213   | Yes |
| GM_DH43 | GM | EN | chr19 | 59334919  | 59335451  | 1658   | 782    | -28364  | Yes |
| GM_DH44 | GM | EN | chr19 | 59358099  | 59360037  | -225   | 0      | -3778   | Yes |
| GM_DH45 | GM | EN | chr19 | 59396593  | 59403623  | 0      | 0      | -23233  | Yes |
| GM_DH46 | GM | EN | chr19 | 59406663  | 59407347  | 9832   | 3476   | -19509  | No  |
| GM_DH47 | GM | EN | chr19 | 59652561  | 59654347  | 349    | 0      | 9868    | Yes |
| GM_DH48 | GM | EN | chr19 | 59754477  | 59755199  | 14495  | 24164  | 72641   | No  |
| GM_DH49 | GM | EN | chr20 | 33336165  | 33337457  | 156    | 12     | 15092   | Yes |
| GM_DH50 | GM | IM | chr20 | 35472263  | 35476299  | 27757  | 3646   | 127458  | No  |
| GM_DH51 | GM | IM | chr20 | 35581492  | 35589402  | 0      | 0      | -36955  | Yes |
| GM_DH52 | GM | IM | chr20 | 41520788  | 41522903  | 806    | 52     | -76879  | Yes |
| GM_DH53 | GM | IM | chr20 | 41569646  | 41570589  | -5898  | 0      | -29193  | No  |
| GM_DH54 | GM | IM | chr20 | 41575537  | 41578696  | 0      | 0      | -21086  | Yes |
| GM_DH55 | GM | IM | chr20 | 56857317  | 56861741  | 9127   | 0      | 0       | Yes |
| GM_DH56 | GM | IM | chr20 | 56893524  | 56897861  | -1891  | 0      | 13966   | Yes |
| GM_DH57 | GM | IM | chr20 | 56913129  | 56919631  | 9482   | 11995  | 33571   | Yes |
| GM_DH58 | GM | IM | chr20 | 56990164  | 56993971  | 430    | 43     | -102150 | Yes |
| GM_DH59 | GM | IM | chr20 | 57010490  | 57014927  | -753   | -370   | -81194  | Yes |
| GM_DH60 | GM | EN | chr21 | 39639325  | 39642137  | 0      | 0      | -40199  | Yes |
| GM_DH61 | GM | EN | chr22 | 30349060  | 30350618  | -746   | -233   | -3772   | Yes |
| GM_DH62 | GM | EN | chr5  | 131733360 | 131736514 | 17     | 0      | -11982  | Yes |
| GM_DH63 | GM | EN | chr5  | 131920776 | 131923246 | 247    | 0      | 29592   | Yes |
| GM_DH64 | GM | EN | chr5  | 132139238 | 132139998 | -968   | -349   | -43455  | Yes |
| GM_DH65 | GM | EN | chr6  | 108720465 | 108722745 | -45    | 0      | 176598  | No  |
| GM_DH66 | GM | IM | chr6  | 144369941 | 144370941 | -305   | 0      | 64324   | Yes |
| GM_DH67 | GM | IM | chr6  | 160459048 | 160461479 | -51794 | -20868 | -17938  | Yes |
| GM_DH68 | GM | IM | chr7  | 93779842  | 93783819  | -15    | 0      | 110116  | No  |
| GM_DH69 | GM | IM | chr7  | 93930348  | 93931723  | 0      | 0      | 0       | Yes |
| GM_DH70 | GM | IM | chr7  | 126817115 | 126819371 | -234   | 0      | -3449   | Yes |
| GM_DH71 | GM | EN | chr7  | 126817286 | 126819186 | -419   | 0      | -3634   | Yes |

---

|         |    |    |       |           |           |        |         |         |     |
|---------|----|----|-------|-----------|-----------|--------|---------|---------|-----|
| GM_DH72 | GM | IM | chr7  | 127262812 | 127265132 | 0      | 0       | -176970 | Yes |
| GM_DH73 | GM | IM | chr7  | 127340931 | 127343449 | 75977  | 0       | -98653  | No  |
| GM_DH74 | GM | IM | chr7  | 128354670 | 128361884 | 0      | 0       | 28706   | Yes |
| GM_DH75 | GM | IM | chr7  | 128376507 | 128382984 | 0      | 0       | -14863  | Yes |
| GM_DH76 | GM | IM | chr7  | 128423109 | 128424921 | 445    | 0       | -19204  | Yes |
| GM_DH77 | GM | IM | chr7  | 128736101 | 128737967 | 67850  | 0       | -108241 | No  |
| GM_DH78 | GM | IM | chr7  | 129156959 | 129160955 | -25785 | -25028  | -83368  | Yes |
| GM_DH79 | GM | IM | chr7  | 129283164 | 129286501 | 0      | 0       | 38291   | Yes |
| GM_DH80 | GM | IM | chr7  | 129719421 | 129727877 | 0      | 0       | 0       | Yes |
| GM_DH81 | GM | IM | chr7  | 130081619 | 130095467 | 205503 | -152146 | 41665   | No  |
| GM_DH82 | GM | EN | chr9  | 128878704 | 128880338 | 0      | 0       | 29151   | Yes |
| GM_DH83 | GM | EN | chrX  | 122588562 | 122592818 | 105880 | 0       | 4864724 | No  |
| GM_DH84 | GM | EN | chrX  | 152686566 | 152688237 | -2979  | 13500   | -148868 | No  |
| GM_DH85 | GM | EN | chrX  | 152752842 | 152755180 | 1817   | -1738   | -81925  | Yes |
| GM_DH86 | GM | EN | chrX  | 152767663 | 152768499 | 8575   | 0       | -68606  | Yes |
| GM_DH87 | GM | EN | chrX  | 152881367 | 152883115 | -861   | -300    | 43187   | Yes |
| GM_DH88 | GM | EN | chrX  | 153092286 | 153093214 | -10933 | 0       | -28890  | No  |
| GM_DH89 | GM | EN | chrX  | 153129104 | 153129598 | 470    | 20      | 5950    | Yes |
| GM_DH90 | GM | EN | chrX  | 153147325 | 153149263 | 0      | 0       | 0       | Yes |
| GM_DH91 | GM | EN | chrX  | 153308305 | 153309559 | 130    | 0       | 159548  | No  |
| GM_DH92 | GM | EN | chrX  | 153336971 | 153338970 | -203   | 0       | 188214  | Yes |
| GM_DH93 | GM | EN | chrX  | 153678705 | 153680902 | 366    | 0       | -168457 | Yes |
| GM_DH94 | GM | EN | chrX  | 153863452 | 153866418 | 0      | 0       | 13343   | Yes |
| T_DH1   | T  | IM | chr1  | 3562580   | 3564540   | -193   | 0       | 3512    | No  |
| T_DH2   | T  | IM | chr1  | 3678584   | 3680503   | -5456  | -5617   | 14229   | No  |
| T_DH3   | T  | EN | chr1  | 147984434 | 147986296 | 289    | 0       | 22596   | Yes |
| T_DH4   | T  | EN | chr1  | 148111240 | 148112722 | 0      | -873    | 149402  | Yes |
| T_DH5   | T  | EN | chr1  | 148398216 | 148399736 | 481    | 0       | 17994   | Yes |
| T_DH6   | T  | IM | chr10 | 64893896  | 64896634  | 0      | 0       | -161889 | Yes |
| T_DH7   | T  | IM | chr10 | 64973983  | 64975610  | 22671  | 21947   | -82913  | Yes |
| T_DH8   | T  | IM | chr10 | 68471752  | 68473011  | 115910 | -2243   | 115562  | Yes |
| T_DH9   | T  | IM | chr10 | 68999235  | 69000175  | -95217 | -193674 | -217871 | Yes |
| T_DH10  | T  | IM | chr11 | 1149732   | 1152569   | 84857  | 3871    | 50592   | No  |
| T_DH11  | T  | IM | chr11 | 1268496   | 1272868   | -14547 | 0       | 169356  | Yes |
| T_DH12  | T  | IM | chr11 | 1280148   | 1286799   | -616   | -167    | 181008  | Yes |
| T_DH13  | T  | IM | chr11 | 1735062   | 1737036   | -4762  | 3446    | 62277   | Yes |
| T_DH14  | T  | IM | chr11 | 1820758   | 1823763   | -7012  | 16801   | 9408    | No  |

---

|        |   |    |       |           |           |         |         |         |     |
|--------|---|----|-------|-----------|-----------|---------|---------|---------|-----|
| T_DH15 | T | IM | chr11 | 1846721   | 1850629   | 0       | 0       | 35371   | Yes |
| T_DH16 | T | IM | chr11 | 1861966   | 1864266   | -4717   | 2056    | 50616   | Yes |
| T_DH17 | T | IM | chr11 | 1866381   | 1869351   | 0       | 6471    | 55031   | Yes |
| T_DH18 | T | EN | chr11 | 1979900   | 1980736   | 4619    | -2573   | 0       | No  |
| T_DH19 | T | IM | chr11 | 2020454   | 2044549   | 45173   | 29887   | 5418    | No  |
| T_DH20 | T | IM | chr11 | 2264700   | 2270767   | -9051   | 15192   | -12282  | No  |
| T_DH21 | T | IM | chr11 | 2277060   | 2284301   | 0       | 27552   | 0       | Yes |
| T_DH22 | T | IM | chr11 | 2355591   | 2356907   | 468     | 0       | -40540  | Yes |
| T_DH23 | T | IM | chr11 | 2676285   | 2678032   | -169836 | 0       | 0       | Yes |
| T_DH24 | T | IM | chr11 | 2875520   | 2879118   | 0       | -759    | 9005    | Yes |
| T_DH25 | T | IM | chr11 | 2915568   | 2916602   | 8341    | -5759   | 6619    | No  |
| T_DH26 | T | EN | chr11 | 64264649  | 64267385  | -452    | 0       | 0       | Yes |
| T_DH27 | T | EN | chr11 | 64287031  | 64289919  | 2267    | 0       | -1342   | Yes |
| T_DH28 | T | EN | chr11 | 64325601  | 64328869  | 0       | 0       | 13416   | Yes |
| T_DH29 | T | EN | chr11 | 64378877  | 64380397  | 10259   | 55      | 10474   | Yes |
| T_DH30 | T | EN | chr13 | 29709172  | 29710882  | -68702  | -68017  | 77529   | Yes |
| T_DH31 | T | EN | chr13 | 29893776  | 29895144  | -41240  | 0       | 65962   | No  |
| T_DH32 | T | IM | chr13 | 47422747  | 47424867  | -48546  | -48214  | -84715  | Yes |
| T_DH33 | T | EN | chr13 | 112713885 | 112715747 | 9816    | 0       | -15592  | Yes |
| T_DH34 | T | EN | chr14 | 98500518  | 98501202  | -20594  | -152956 | -301091 | No  |
| T_DH35 | T | EN | chr14 | 98733800  | 98736498  | -71077  | 21280   | -65795  | Yes |
| T_DH36 | T | IM | chr14 | 100382585 | 100387433 | 0       | 18399   | 0       | Yes |
| T_DH37 | T | IM | chr14 | 100781163 | 100784077 | 239765  | -116967 | 9204    | No  |
| T_DH38 | T | IM | chr15 | 19173804  | 19175402  | -160950 | -45393  | 351671  | No  |
| T_DH39 | T | IM | chr15 | 19220400  | 19221246  | -115106 | 0       | 398267  | No  |
| T_DH40 | T | IM | chr15 | 20046723  | 20050653  | 162886  | 0       | 82763   | No  |
| T_DH41 | T | IM | chr15 | 20635165  | 20637281  | -596    | 0       | 246458  | Yes |
| T_DH42 | T | IM | chr15 | 22750714  | 22753632  | 0       | 0       | -736430 | Yes |
| T_DH43 | T | IM | chr15 | 22814313  | 22814877  | -62516  | 62166   | -675185 | No  |
| T_DH44 | T | IM | chr15 | 23659668  | 23660655  | 0       | 0       | -68836  | Yes |
| T_DH45 | T | IM | chr15 | 27141773  | 27143790  | -6362   | -39143  | -25419  | Yes |
| T_DH46 | T | IM | chr15 | 28714167  | 28715765  | 23268   | 8310    | 12874   | No  |
| T_DH47 | T | IM | chr15 | 29471427  | 29473136  | -7531   | 0       | -41313  | No  |
| T_DH48 | T | IM | chr15 | 29561290  | 29564608  | 80622   | 0       | -2883   | Yes |
| T_DH49 | T | EN | chr15 | 41571161  | 41573175  | 0       | 0       | -20365  | Yes |
| T_DH50 | T | EN | chr15 | 41668479  | 41669581  | -99     | 0       | 0       | Yes |
| T_DH51 | T | EN | chr15 | 41768419  | 41769407  | -105    | 0       | 0       | Yes |

---

---

|        |   |    |       |           |           |        |         |         |     |
|--------|---|----|-------|-----------|-----------|--------|---------|---------|-----|
| T_DH52 | T | EN | chr16 | 127491    | 128859    | -13994 | 0       | 19004   | No  |
| T_DH53 | T | EN | chr16 | 343559    | 345535    | 1093   | -4450   | -6511   | No  |
| T_DH54 | T | EN | chr16 | 359329    | 360583    | 0      | 0       | 6933    | Yes |
| T_DH55 | T | EN | chr16 | 367727    | 371147    | -761   | 0       | 15331   | Yes |
| T_DH56 | T | IM | chr18 | 42779207  | 42782783  | 0      | 0       | -97483  | Yes |
| T_DH57 | T | EN | chr18 | 59787627  | 59790211  | 0      | 0       | -7213   | Yes |
| T_DH58 | T | EN | chr19 | 59064511  | 59066867  | 6      | 0       | 26850   | Yes |
| T_DH59 | T | EN | chr19 | 59076785  | 59077165  | -113   | 0       | -24303  | No  |
| T_DH60 | T | EN | chr19 | 59652637  | 59654271  | 425    | 0       | 9944    | Yes |
| T_DH61 | T | EN | chr19 | 59708231  | 59708649  | 2406   | -21367  | 26395   | Yes |
| T_DH62 | T | IM | chr19 | 61796780  | 61799699  | 0      | 0       | 200188  | Yes |
| T_DH63 | T | EN | chr2  | 220187477 | 220190213 | 0      | 0       | 1032    | Yes |
| T_DH64 | T | IM | chr20 | 35472702  | 35474950  | 28196  | 4085    | 127897  | No  |
| T_DH65 | T | IM | chr20 | 35582620  | 35584697  | 0      | 0       | -41660  | Yes |
| T_DH66 | T | IM | chr20 | 41520741  | 41522762  | 759    | 5       | -77020  | Yes |
| T_DH67 | T | IM | chr20 | 41575631  | 41577568  | 0      | 0       | -22214  | Yes |
| T_DH68 | T | IM | chr20 | 56701625  | 56705077  | 323    | 0       | -155708 | Yes |
| T_DH69 | T | IM | chr20 | 56857902  | 56861052  | 9712   | 0       | 0       | Yes |
| T_DH70 | T | IM | chr20 | 56896136  | 56898309  | -1443  | 0       | 16578   | Yes |
| T_DH71 | T | IM | chr20 | 56990211  | 56993736  | 477    | 90      | -102385 | Yes |
| T_DH72 | T | IM | chr20 | 57010490  | 57015308  | -372   | 0       | -80813  | Yes |
| T_DH73 | T | EN | chr22 | 30349364  | 30351074  | -290   | 0       | -3316   | Yes |
| T_DH74 | T | EN | chr22 | 30468076  | 30470394  | -4228  | 0       | 113136  | No  |
| T_DH75 | T | EN | chr5  | 56360903  | 56362499  | 77193  | 76795   | 32825   | No  |
| T_DH76 | T | EN | chr6  | 41854637  | 41856575  | 0      | 0       | 2797    | Yes |
| T_DH77 | T | IM | chr6  | 160367937 | 160371999 | 7395   | 6636    | 34459   | Yes |
| T_DH78 | T | IM | chr6  | 160459599 | 160461620 | -51653 | -20727  | -17797  | Yes |
| T_DH79 | T | IM | chr7  | 50623291  | 50624362  | -11005 | 0       | -285287 | Yes |
| T_DH80 | T | IM | chr7  | 93803864  | 93805615  | 19836  | 19264   | -124050 | Yes |
| T_DH81 | T | EN | chr7  | 114161988 | 114168562 | 5828   | 4844    | 61945   | Yes |
| T_DH82 | T | IM | chr7  | 127100404 | 127101839 | -98410 | -163270 | 157009  | Yes |
| T_DH83 | T | IM | chr7  | 127292530 | 127294364 | 27576  | 25726   | -147738 | Yes |
| T_DH84 | T | IM | chr7  | 127341119 | 127343449 | 76165  | 0       | -98653  | No  |
| T_DH85 | T | IM | chr7  | 128370921 | 128373225 | -5437  | -5421   | -24622  | No  |
| T_DH86 | T | IM | chr7  | 128734757 | 128737510 | 66506  | 0       | -108698 | No  |
| T_DH87 | T | IM | chr7  | 129671785 | 129675851 | 0      | 0       | -48560  | Yes |
| T_DH88 | T | IM | chr7  | 129719421 | 129721066 | 0      | 0       | -3345   | Yes |

---

---

|        |   |    |      |           |           |         |         |         |     |
|--------|---|----|------|-----------|-----------|---------|---------|---------|-----|
| T_DH89 | T | IM | chr7 | 129724411 | 129726232 | 0       | 0       | 0       | Yes |
| T_DH90 | T | IM | chr7 | 130050755 | 130058690 | 174639  | 174122  | 10801   | No  |
| T_DH91 | T | IM | chr7 | 130080249 | 130095467 | 204133  | -152146 | 40295   | No  |
| T_DH92 | T | IM | chr7 | 130248436 | 130254097 | -215795 | 0       | 36824   | No  |
| T_DH93 | T | IM | chr7 | 131017713 | 131019687 | -267665 | -67742  | 15795   | No  |
| T_DH94 | T | EN | chrX | 152686566 | 152688624 | -2592   | 13500   | -148481 | No  |
| T_DH95 | T | EN | chrX | 153336780 | 153338742 | -431    | 0       | 188023  | Yes |
| T_DH96 | T | EN | chrX | 153679148 | 153681966 | 809     | 0       | -167393 | Yes |
| T_DH97 | T | EN | chrX | 153863618 | 153866608 | 113     | 119     | 13509   | Yes |

---
