# Supplementary material for: Overlapping euchromatin/heterochromatin- associated marks are enriched in imprinted gene regions and predict allele-specific modification
Source: HighWire-hosted journal article supplement (doi:10.1101/gr.067587.107), 2008-09-16
Supplement: Wen_Supplemental_Table_5.pdf [file Wen_Supplemental_Table_5.pdf]

**Supplemental Table 5.** Double hits in imprinted genes are associated with alternative transcripts

| Cells           | N  | Double hits within 1 kb                |       |          |
|-----------------|----|----------------------------------------|-------|----------|
|                 |    | of alternative transcript <sup>1</sup> | Ratio | P        |
| GM06991         |    |                                        |       |          |
| Imprinted Genes | 16 | 14 (87.5%)                             | 3.94  | 0.000076 |
| Control Genes   | 27 | 6 (22.2%)                              |       |          |
| T cell          |    |                                        |       |          |
| Imprinted Genes | 16 | 12 (75%)                               | 3.75  | 0.000909 |
| Control Genes   | 25 | 5 (20%)                                |       |          |

<sup>1</sup> Number of genes with double hits, in which the double hit lies within 1 kb of an alternative transcript
