# Supplementary material for: Overlapping euchromatin/heterochromatin- associated marks are enriched in imprinted gene regions and predict allele-specific modification
Source: HighWire-hosted journal article supplement (doi:10.1101/gr.067587.107), 2008-09-16
Supplement: Wen_Supplemental_Table_6.pdf [file Wen_Supplemental_Table_6.pdf]

Supplemental Table 6. Primer sequences

| Locus                                     | Primer 1                       | Primer 2                       |
|-------------------------------------------|--------------------------------|--------------------------------|
| <u>Quantitative Real-Time PCR primers</u> |                                |                                |
| <i>GAPDH</i>                              | CCCGTCCTTGACTCCCTAGTG          | TCTTGAGGCCTGAGCTACGTG          |
| <i>RPS18</i>                              | CCAAAATGTGGAGTGAAGTTGA         | ACCCGTGATATTACCTGTTTGG         |
| <i>RPL19</i>                              | AATAAAACATCCACCCACAACC         | GTTCCCAATCACGTGGTTATCT         |
| <i>Sat2</i>                               | CATCGATGGAAATGAAAGGAGTC        | ACCATTGGATGATTGCAGTCAA         |
| <i>GAGE5</i>                              | ATTTCTGTTTTCGCAGGTGGTT         | TCTGCTGTTTTCTATGCCTCTG         |
| <i>HIST1H2BA</i>                          | ACTCTCCTTACGGGTCTCTTTG         | AGTGCTGTGTAACCCCTGGAAAA        |
| <i>GM_DH5</i>                             | TAGCGTCTCCATCAGCACAC           | AAAAGCAAAGCGGTCAAAGA           |
| <i>GM_DH13</i>                            | CCTCTAACCCCAATCCCAAT           | GCATCATGGCTCTGAGTTGA           |
| <i>GM_DH19</i>                            | AACAAAAGACAGCCCCACAC           | GCCAGGCATTTCCATTTCTA           |
| <i>GM_DH26</i>                            | ATCAGGGTGATTGCAGTTCC           | CGCTCAACACCCCTAAATA            |
| <i>GM_DH42</i>                            | CTCTCAGTCCTCTGGCTGCT           | AGACTGAGACCCAGCCATCA           |
| <i>GM_DH51</i>                            | TCCAGAAGATCCCAATCAGG           | GGCAGCCATCATTAGAGGAA           |
| <i>GM_DH53</i>                            | GCTCGCCAATCTGTCTCACT           | TGCACATGCTATGCTCTGGT           |
| <i>GM_DH55</i>                            | CAAGGTAGGCTTTGGAGTGG           | GCTTGCTTTTGGATTTTGCT           |
| <i>GM_DH56</i>                            | CAGCAGTCGGAGAACATCTG           | CCAAGTGCACCGACTAGAAA           |
| <i>GM_DH68</i>                            | GTGGTTCCATCCTCTGTGTG           | TTTCCAGTCCCTAAAATGC            |
| <i>GM_DH70</i>                            | AATTAGGGGAAGGGCTGAAA           | CCGGCATTGGATAAAGAGAA           |
| <i>GM_DH71</i>                            | CTGCGGAACAATTCACACCT           | GGGTCCTGCTCCAAGAAAAC           |
| <i>GM_DH76</i>                            | TTTCAGCTCCTCCACCTCAC           | AGTGACCATGCCTTGATGCT           |
| <i>GM_DH79</i>                            | TTCACGGGAGATTTTCATTCA          | TCCACAGGCTCTCAACACTC           |
| <i>GM_DH90</i>                            | TGTTGGGCTTTCTGTGAACC           | GCAGGGGCTCTTCCACTACT           |
| <u>Sequencing primers</u>                 |                                |                                |
| <i>MEST</i>                               | TTAGACTCCGGCTTCCCTCT           | TCACTCGCGCTTGTTACTGA           |
| <i>GNAS</i>                               | GACTAAACGGGATCGCAACT           | TCGCTCTGGGTATCTTAGGG           |
| <u>Bisulfite Sequencing primers</u>       |                                |                                |
| <i>SNRPN</i>                              |                                |                                |
| 1 <sup>st</sup> round                     | TGATTGATAGGTTAGGTGATGTTTG      | TCCTTACCACTACACCCTAAAAAAA      |
| 2 <sup>nd</sup> round                     | GGGAATTAGGTTTTGGAAGTTAT        | ACAACAAAACCTAAACACACACCAC      |
| <i>KCNQ1</i>                              |                                |                                |
| 1 <sup>st</sup> round                     | TGTTTTTAATGAGGTTTTATTTAAA      | ATAAAAATTAATAATCCATATTATAATTTT |
| 2 <sup>nd</sup> round                     | TTAATTTAGGTAAATTTTATGTTAGGATGT | CCATATTATAATTTTAAATCAAACCC     |
| <u>Pyrosequencing primers</u>             |                                |                                |
| <i>SERPINB10</i>                          | /5Biosg/GCAAACCAGTGCAAATGATG   | CAGCCCATTAATGTCTTCTGG          |
| <i>PDIA3</i>                              | /5Biosg/TTTCCACCAGATTGAGAACC   | GGACCCAGTCAGTCTACAGC           |
| <i>SNX27</i>                              | /5Biosg/ATGAGCCACTGTGTCCTTCC   | TGCCGTAGTTATGGGTGGTT           |
| <i>GCC1</i>                               | TGCAGCTGAACAGATGGAAG           | /5Biosg/TGCTGTAACCTGAGCCTGGAA  |
